# Supplementary material for: 9-cis-13,14-Dihydroretinoic Acid Is an Endogenous Retinoid Acting as RXR Ligand in Mice
Source: PubMed Central journal article supplement (PMC4451509; doi:10.1371/journal.pgen.1005213), 2015-06-01
Supplement: pgen.1005213.s001.pdf [file pgen.1005213.s001.pdf]

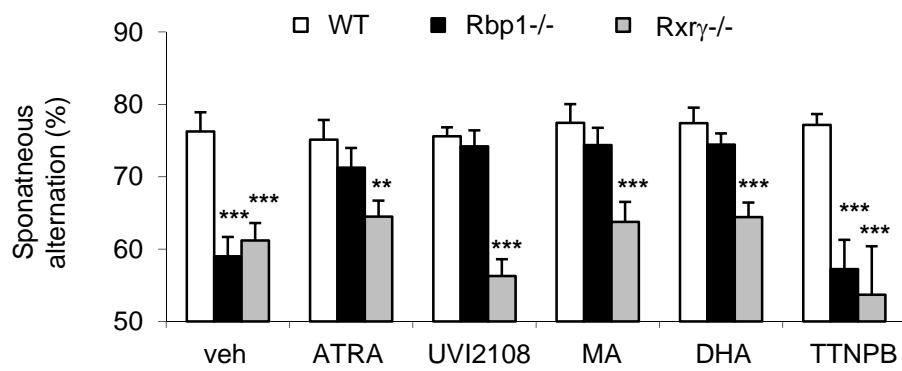

**Supporting Figure 1. Compromised RXR signalling in Rbp1<sup>-/-</sup> mice.**
