# Supplementary material for: 9-cis-13,14-Dihydroretinoic Acid Is an Endogenous Retinoid Acting as RXR Ligand in Mice
Source: PubMed Central journal article supplement (PMC4451509; doi:10.1371/journal.pgen.1005213), 2015-06-01
Supplement: pgen.1005213.s003.pdf [file pgen.1005213.s003.pdf]

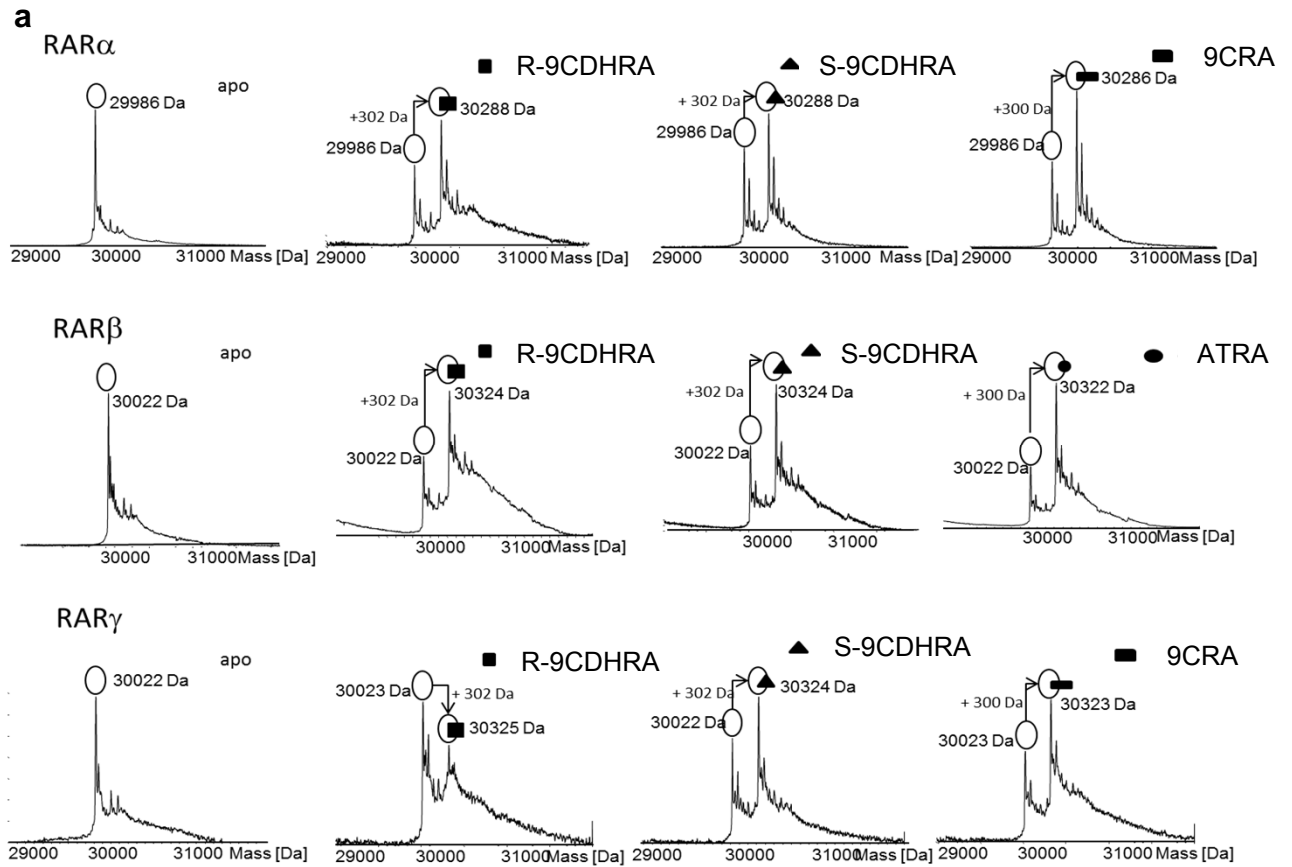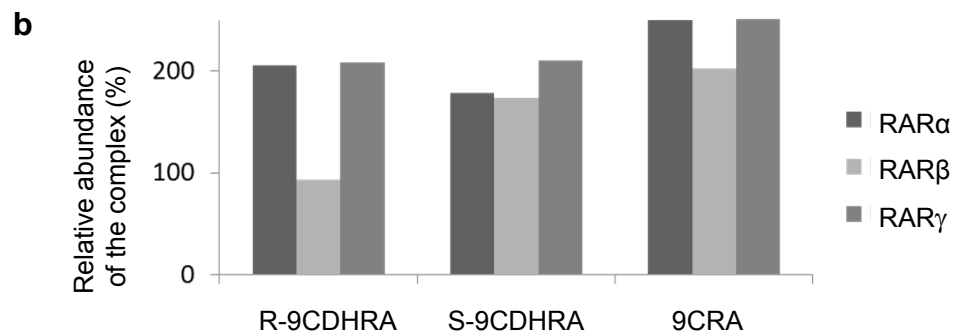

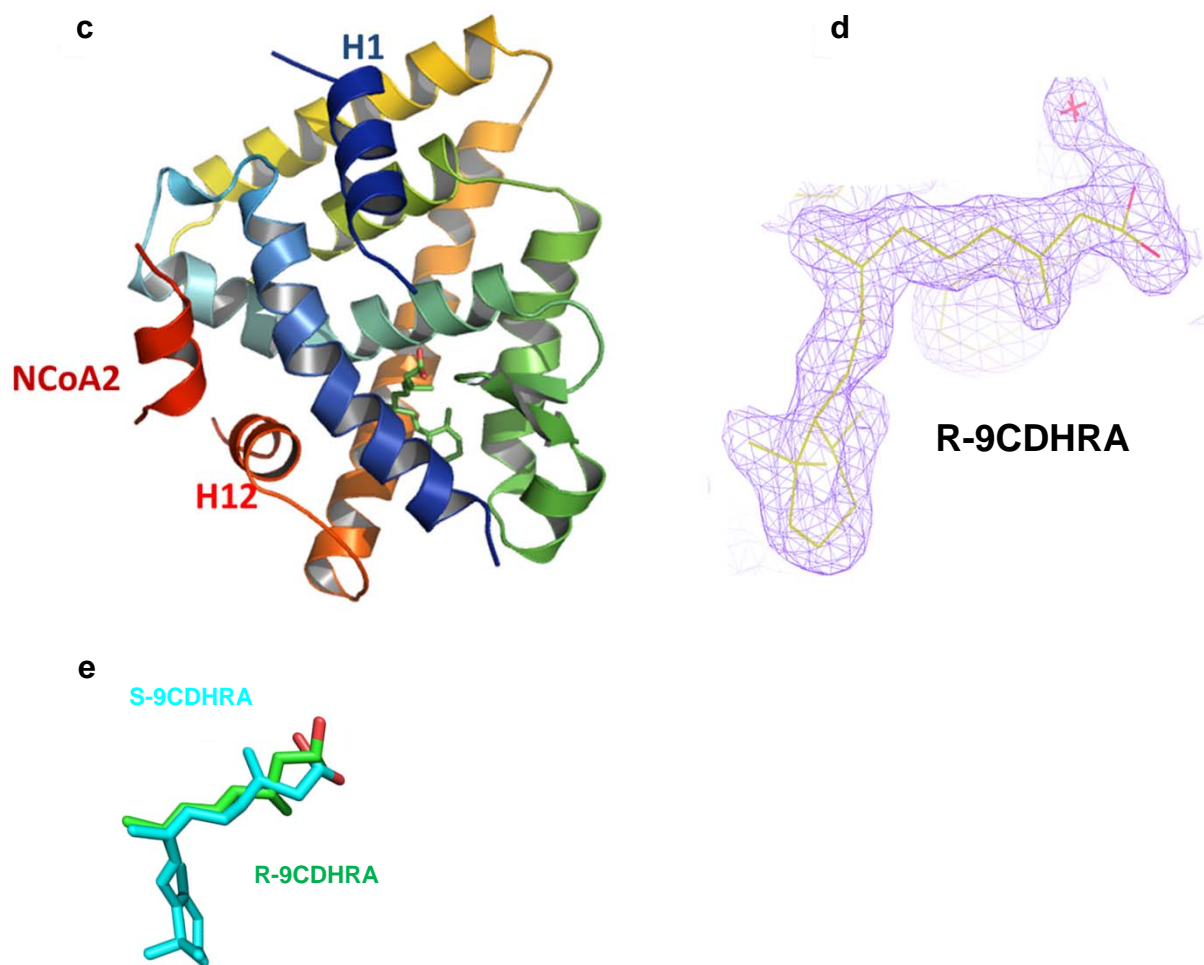

**Supporting Figure 3 : Binding of 9CDHRA (R and S enantiomers) to RAR LBD isotypes in non-denaturing ESI-MS assays and crystallography, and in silico analyses of 9CDHRA binding to RXR.**
