# Supplementary material for: 9-cis-13,14-Dihydroretinoic Acid Is an Endogenous Retinoid Acting as RXR Ligand in Mice
Source: PubMed Central journal article supplement (PMC4451509; doi:10.1371/journal.pgen.1005213), 2015-06-01
Supplement: pgen.1005213.s004.pdf [file pgen.1005213.s004.pdf]

| <b>RXR<math>\alpha</math> LBD/R-DHRA /NCoA2</b>              |                                  |
|--------------------------------------------------------------|----------------------------------|
| <i>Data processing</i>                                       |                                  |
| Resolution (Å)                                               | 25-1.8 (1.86-1.80)               |
| Crystal space group                                          | P4 <sub>3</sub> 2 <sub>1</sub> 2 |
| Cell parameters (Å)                                          | $a = b = 64.014$ ; $c = 112.066$ |
| Unique reflections                                           | 22407                            |
| Mean redundancy                                              | 7.9 (3.8)                        |
| $R_{\text{sym}}$ (%) <sup>a</sup>                            | 5.2 (48.1)                       |
| Completeness (%)                                             | 99.2 (97.2)                      |
| Mean $I/\sigma$                                              | 34.7(2.3)                        |
| <i>Refinement</i>                                            |                                  |
| Resolution (Å)                                               | 24-1.8                           |
| Number of non-hydrogen atoms                                 |                                  |
| RXR-LBD                                                      | 1680                             |
| Coactivator peptide                                          | 98                               |
| Ligand                                                       | 22                               |
| Water molecules                                              | 181                              |
| RMSD bond length (Å)                                         | 0.006                            |
| RMSD bond angles (°)                                         | 1.065                            |
| $R_{\text{cryst}}$ (%) <sup>b</sup>                          | 17.9                             |
| $R_{\text{free}}$ (%) <sup>c</sup>                           | 22.1                             |
| Averaged $B$ factor for non-hydrogen atoms (Å <sup>2</sup> ) |                                  |
| RXR-LBD                                                      | 37.6                             |
| Coactivator peptide                                          | 44.6                             |
| R-DHRA                                                       | 31.2                             |
| Water                                                        | 44.5                             |

**SupportingTable 1**

**Data collection and refinement statistics.**
